# Supplementary material for: Hepatic steatosis and steatohepatitis: a functional meta-analysis of sex-based differences in transcriptomic studies
Source: PubMed Central journal article supplement (PMC7995602; doi:10.1186/s13293-021-00368-1), 2021-03-25
Supplement: 13293_2021_368_MOESM2_ESM.pdf [file 13293_2021_368_MOESM2_ESM.pdf]

**GO:0071352  
(cellular response to interleukin-2)**

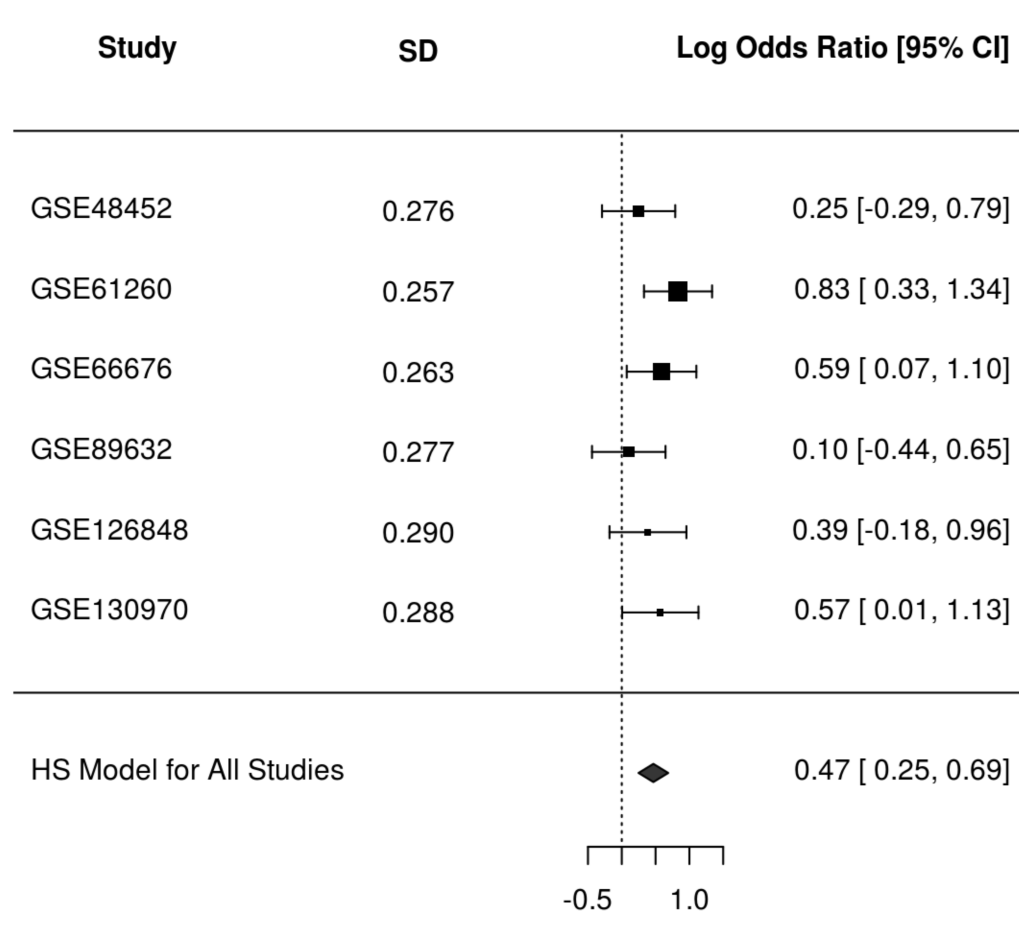

**GO:0090177  
(establishment of planar polarity involved in neural tube closure)**

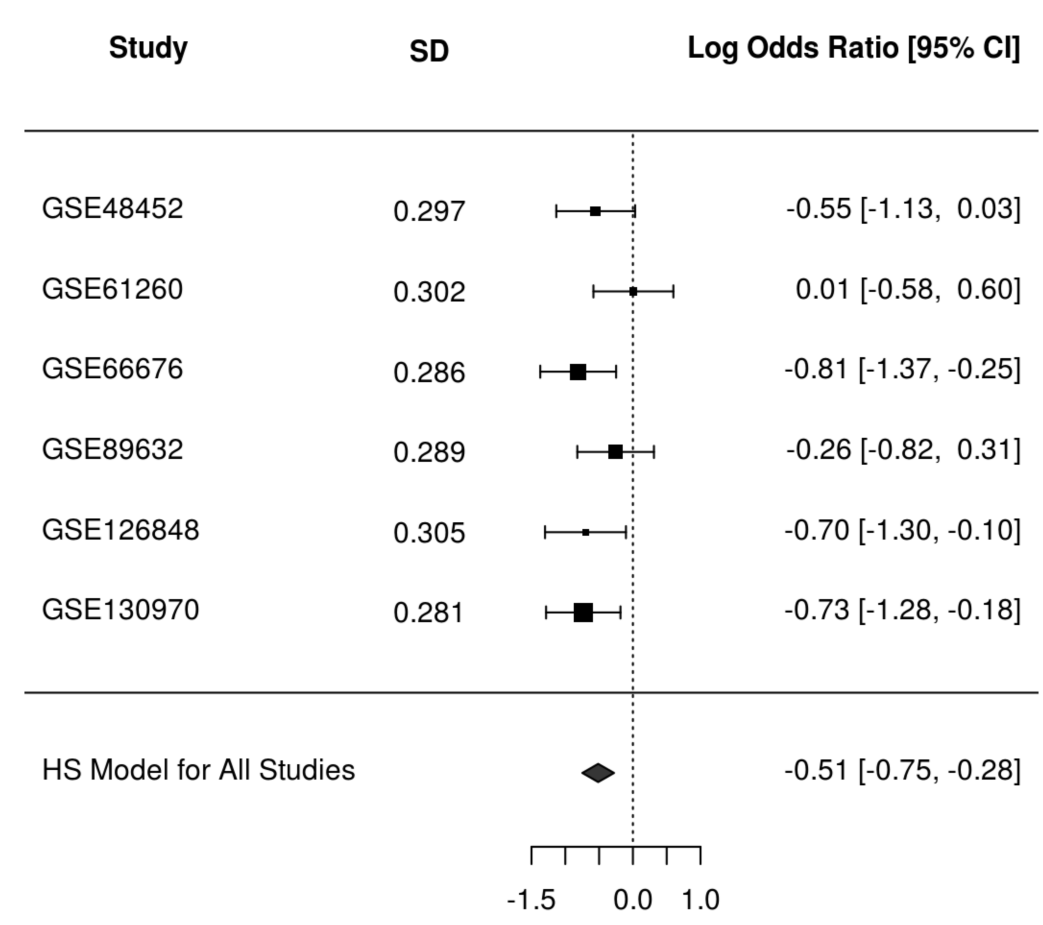

**GO:1900165  
(negative regulation of interleukin-6 secretion)**

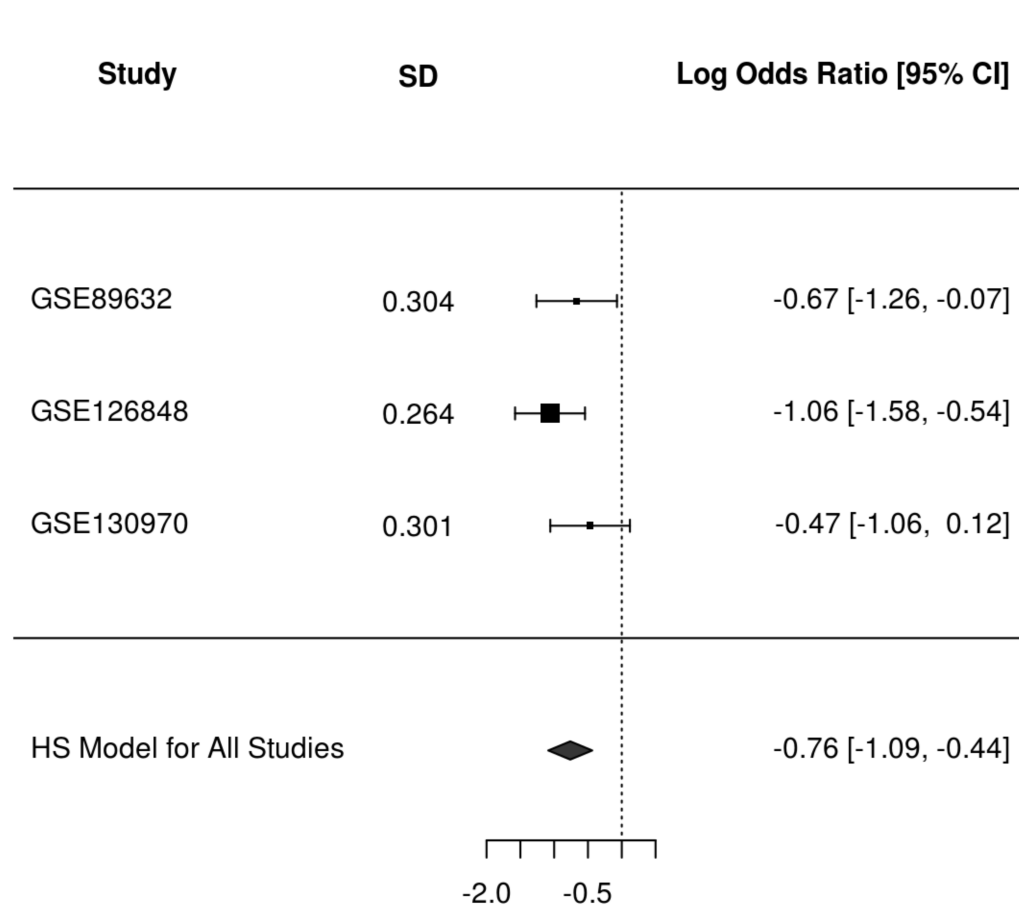

**GO:1901215  
(negative regulation of neuron death)**

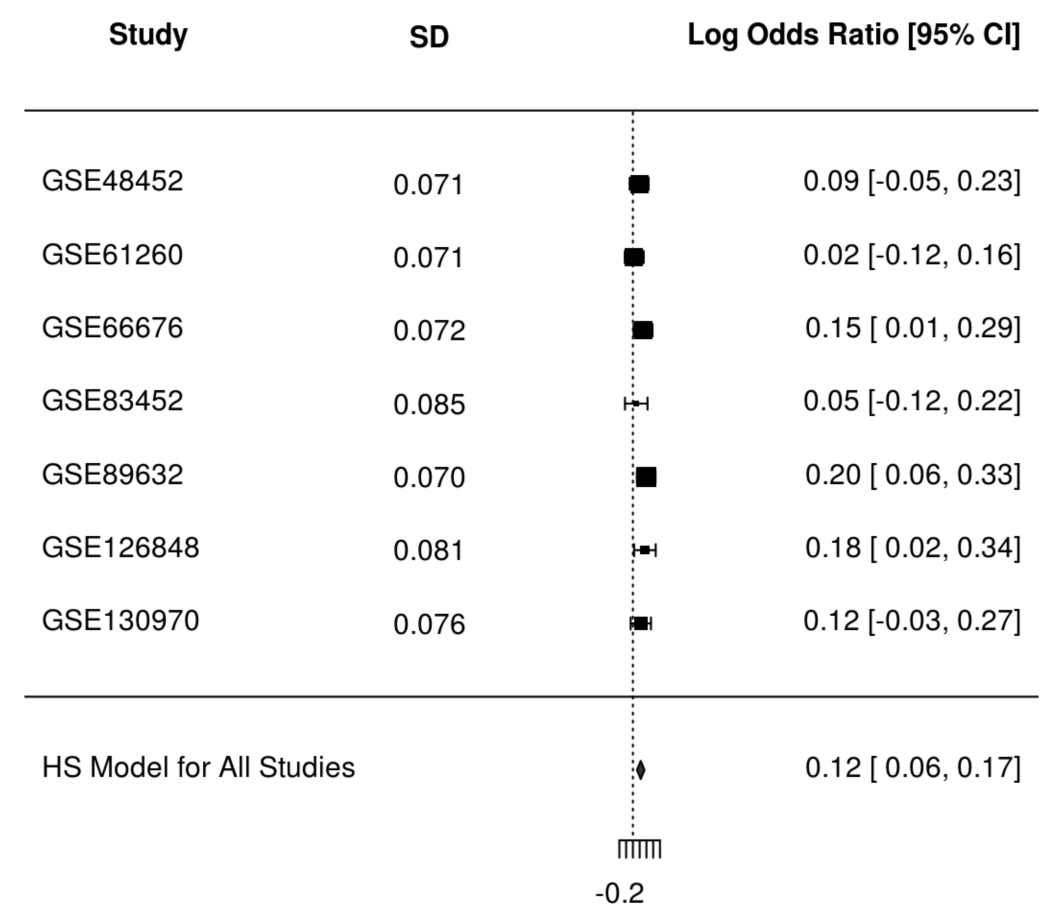

**GO:0090178  
(regulation of establishment of planar polarity involved in n...)**

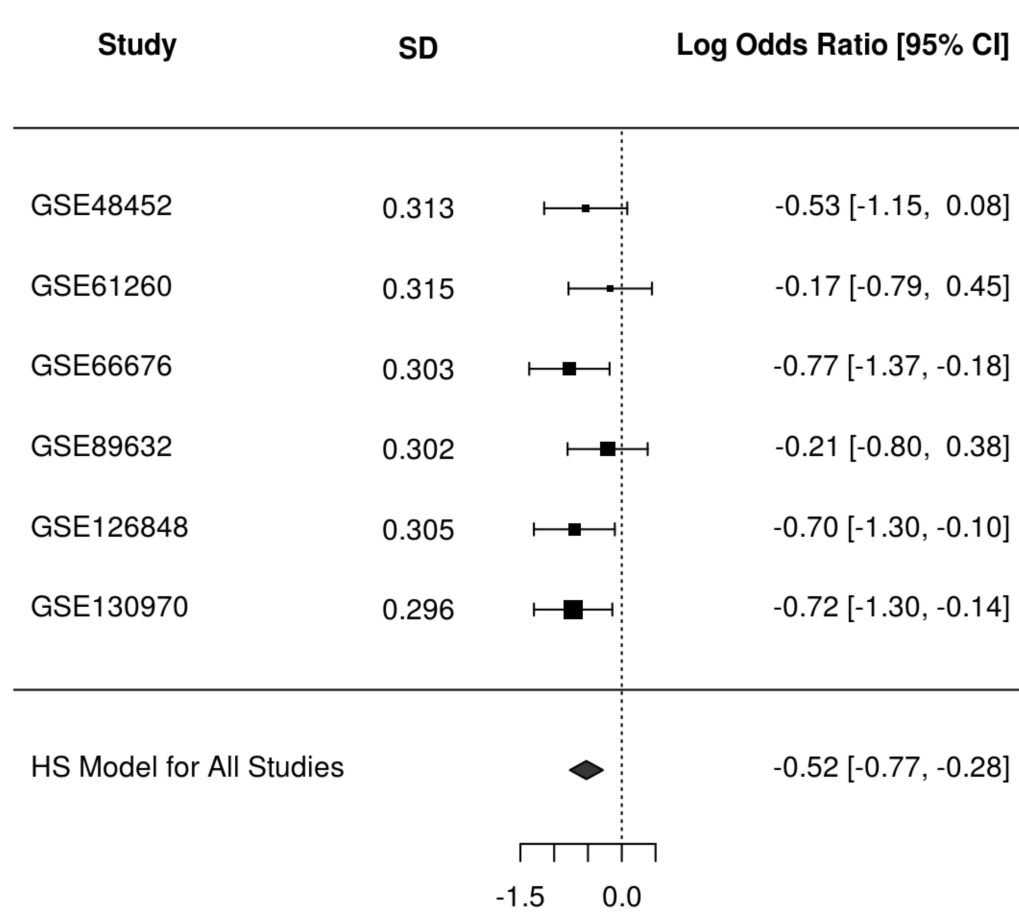

**GO:0070669  
(response to interleukin-2)**

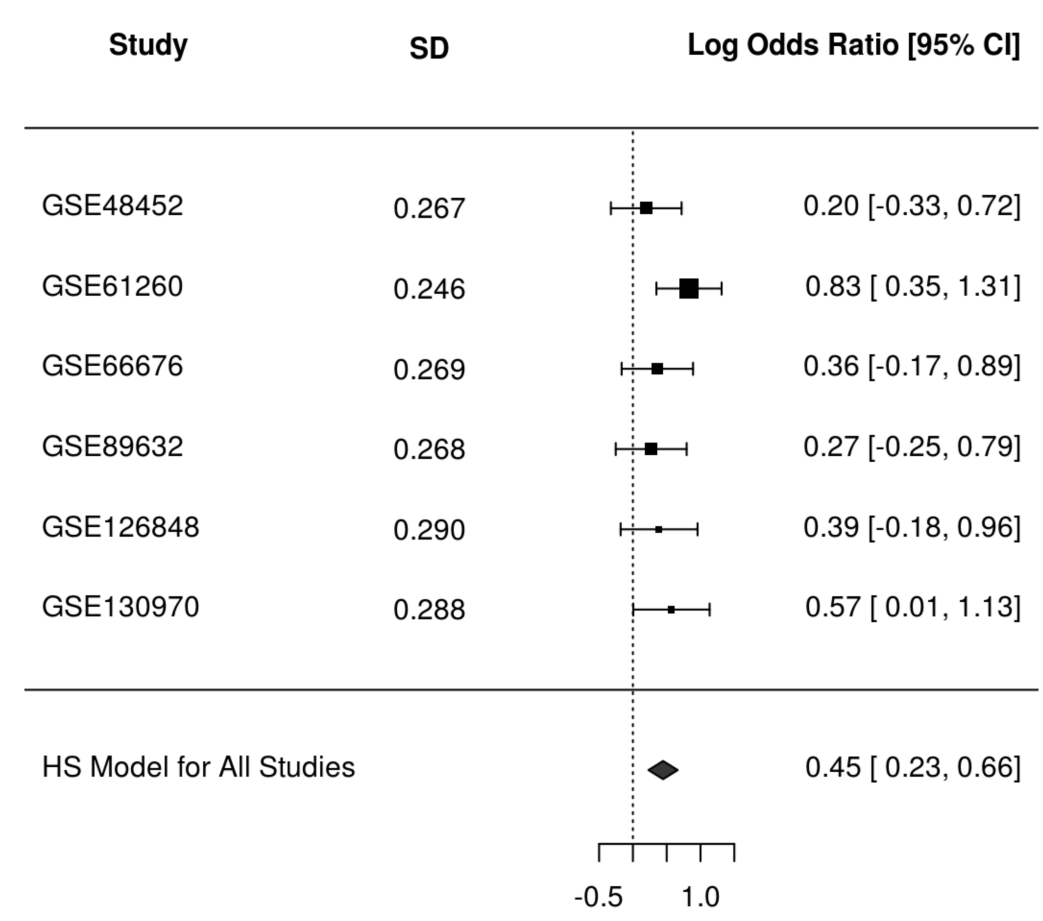

**GO:0001012  
(RNA polymerase II regulatory region DNA binding)**

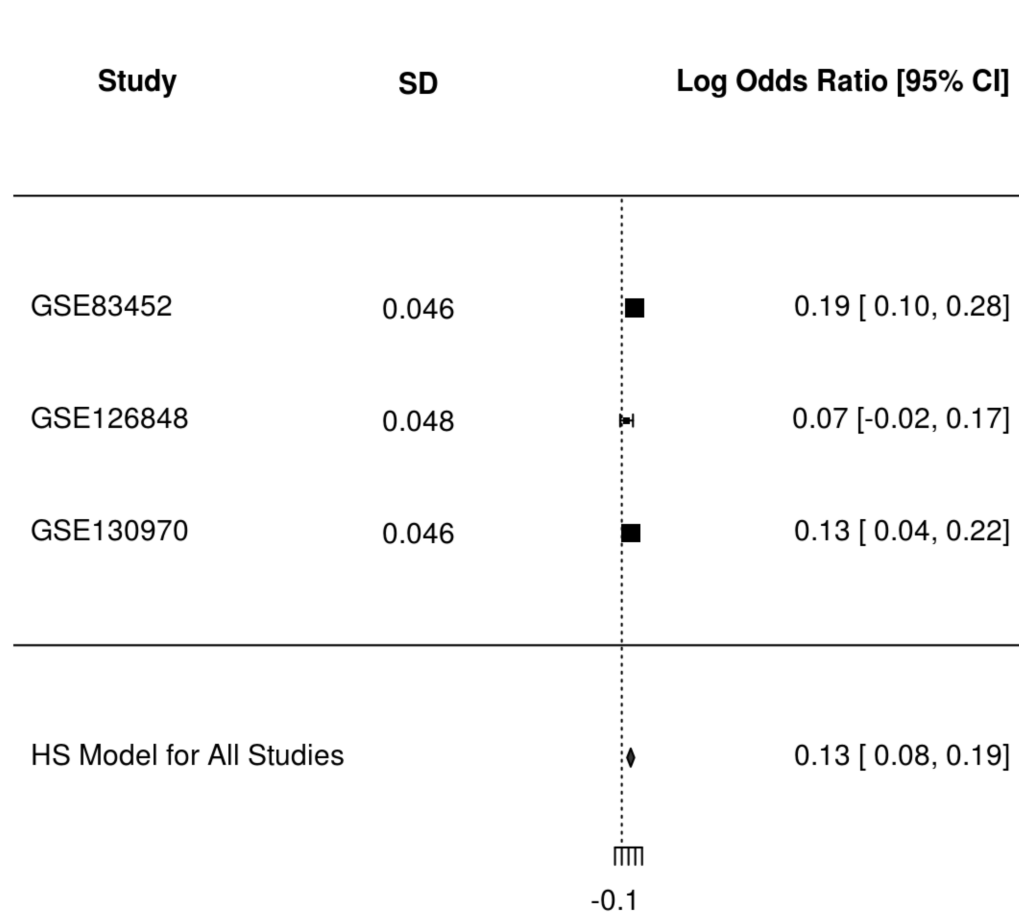

**GO:0000977  
(RNA polymerase II regulatory region sequence-specific DNA bi...)**

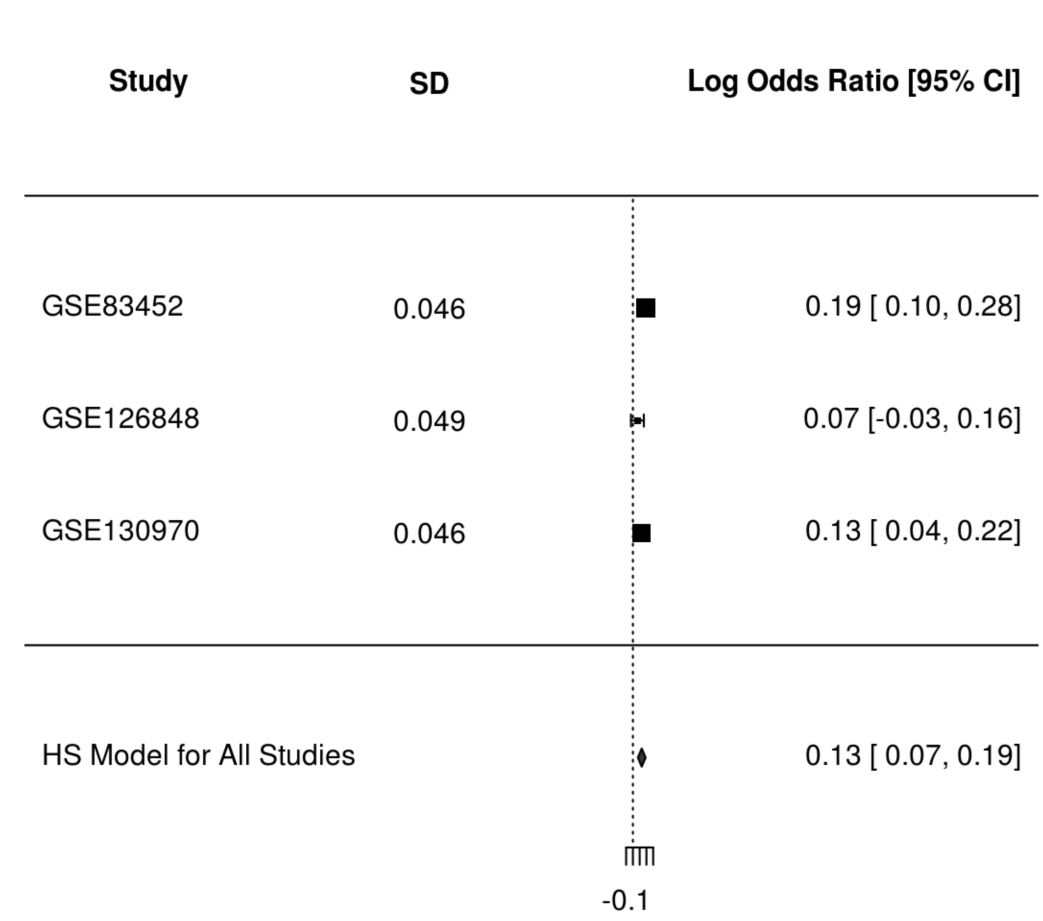

**GO:0017166  
(vinculin binding)**

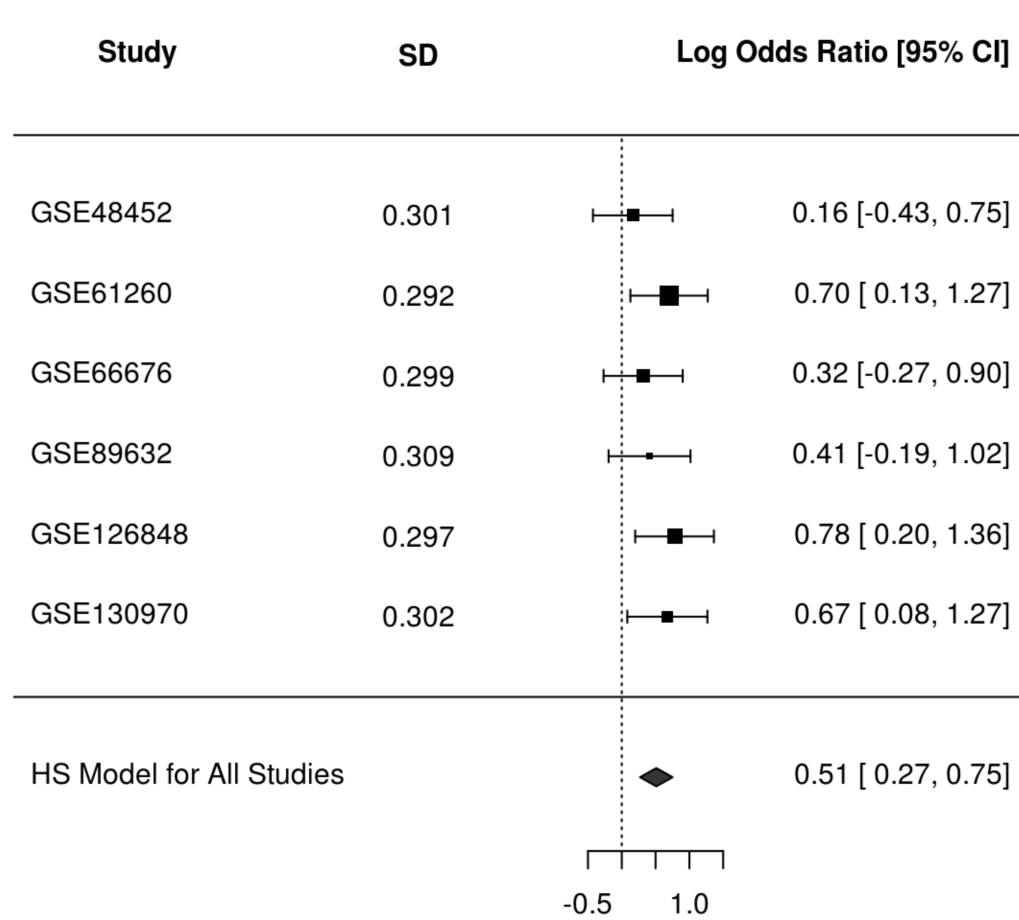

**Supplementary Figure 2. Forest plots for significant GO terms from our functional gene meta-analysis.**
