# Supplementary material for: Hepatic steatosis and steatohepatitis: a functional meta-analysis of sex-based differences in transcriptomic studies
Source: PubMed Central journal article supplement (PMC7995602; doi:10.1186/s13293-021-00368-1), 2021-03-25
Supplement: 13293_2021_368_MOESM3_ESM.pdf [file 13293_2021_368_MOESM3_ESM.pdf]

**GO:0098655**  
(cation transmembrane transport)

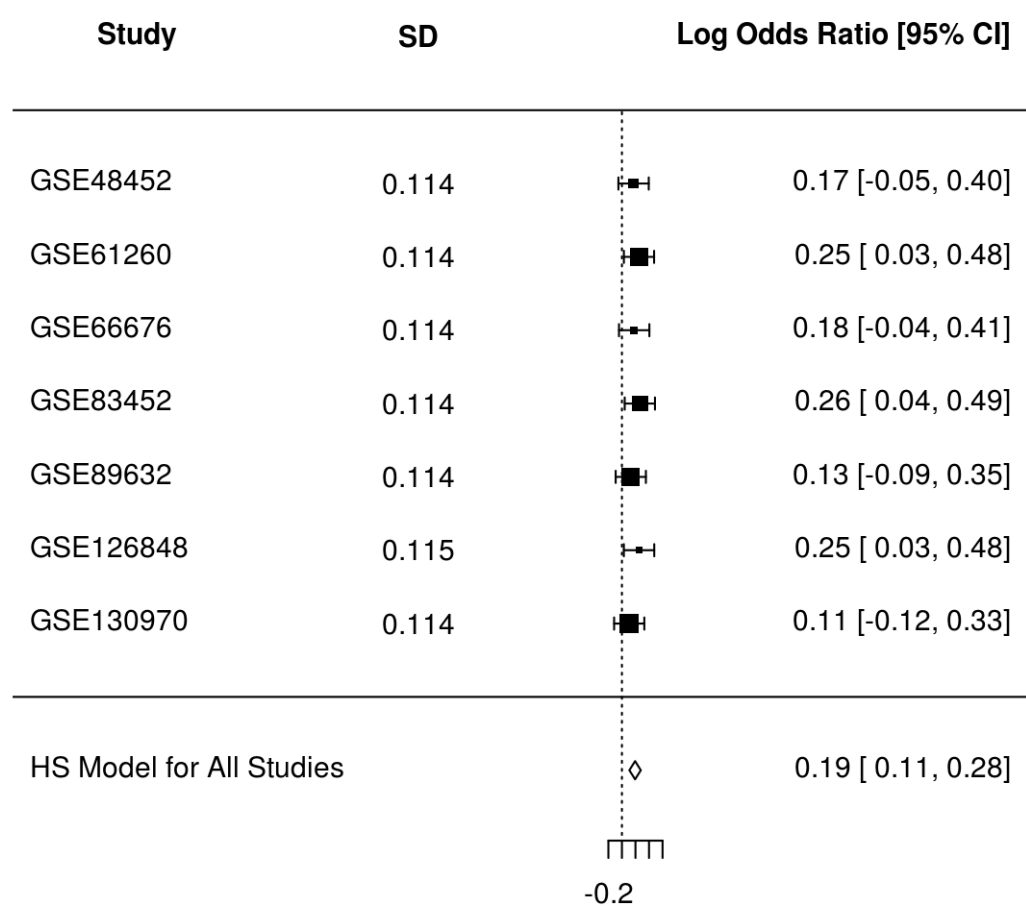

**GO:0098662**  
(inorganic cation transmembrane transport)

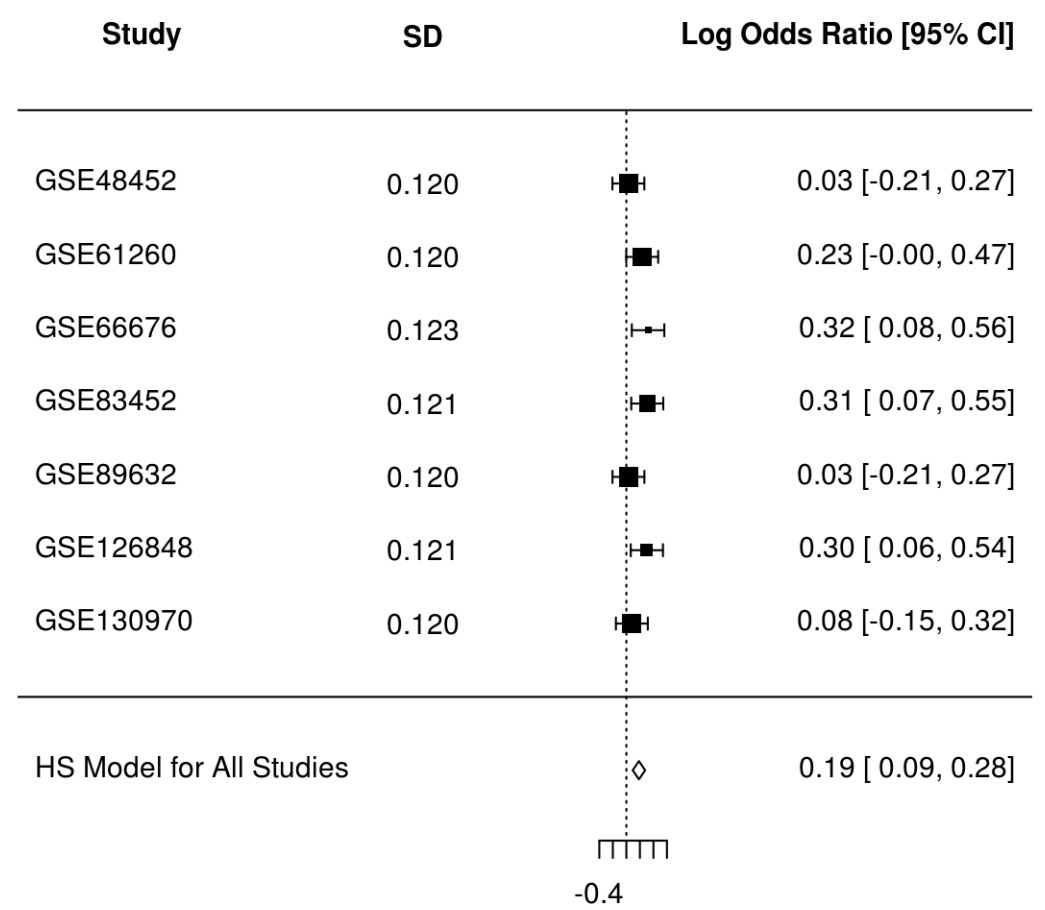

**GO:0030001**  
(metal ion transport)

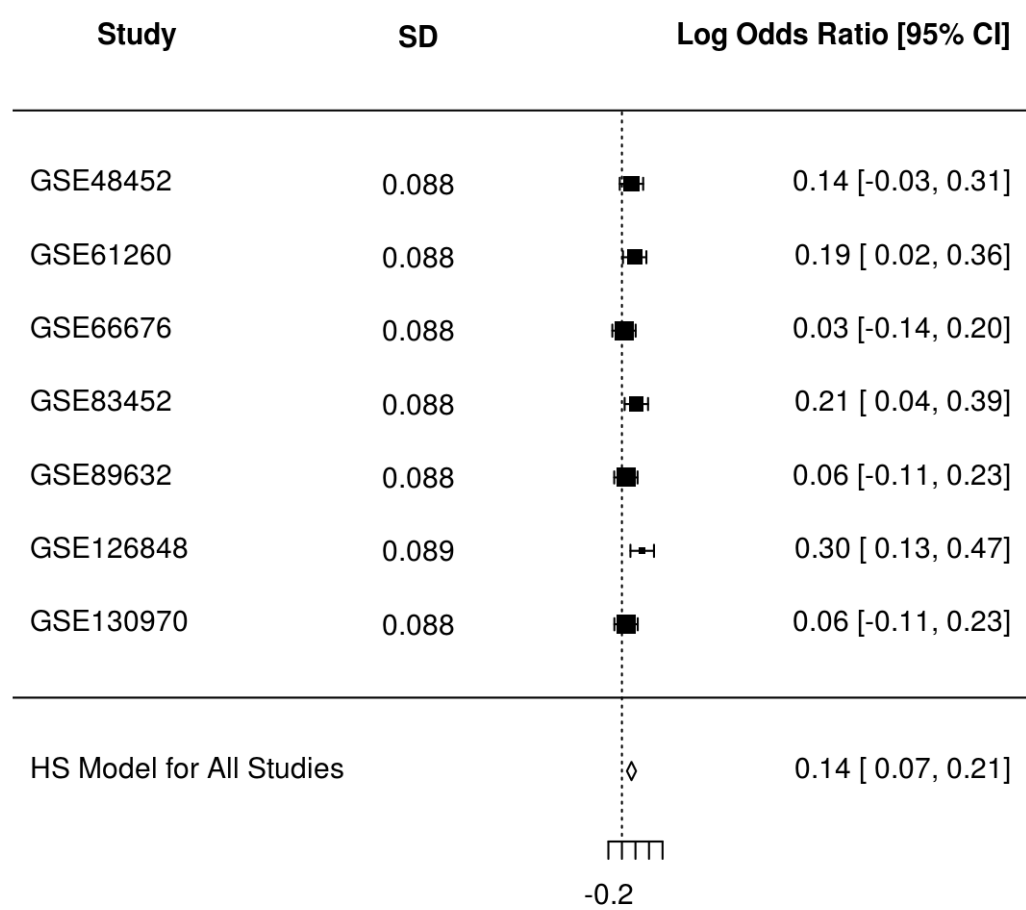

**GO:1904062**  
(regulation of cation transmembrane transport)

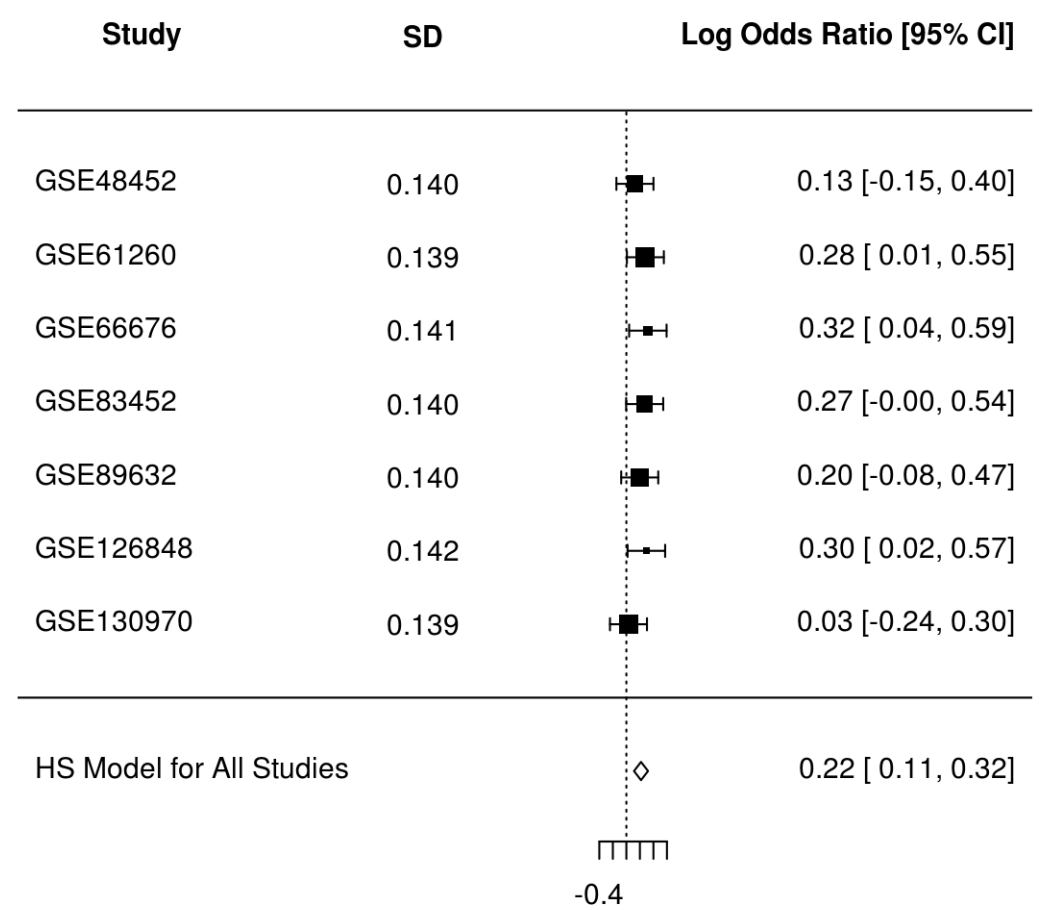

**Supplementary Figure 3. Forest plots of significant GO terms from our functional pathways meta-analysis.**
