# Supplementary material for: Hepatic steatosis and steatohepatitis: a functional meta-analysis of sex-based differences in transcriptomic studies
Source: PubMed Central journal article supplement (PMC7995602; doi:10.1186/s13293-021-00368-1), 2021-03-25
Supplement: 13293_2021_368_MOESM4_ESM.pdf [file 13293_2021_368_MOESM4_ESM.pdf]

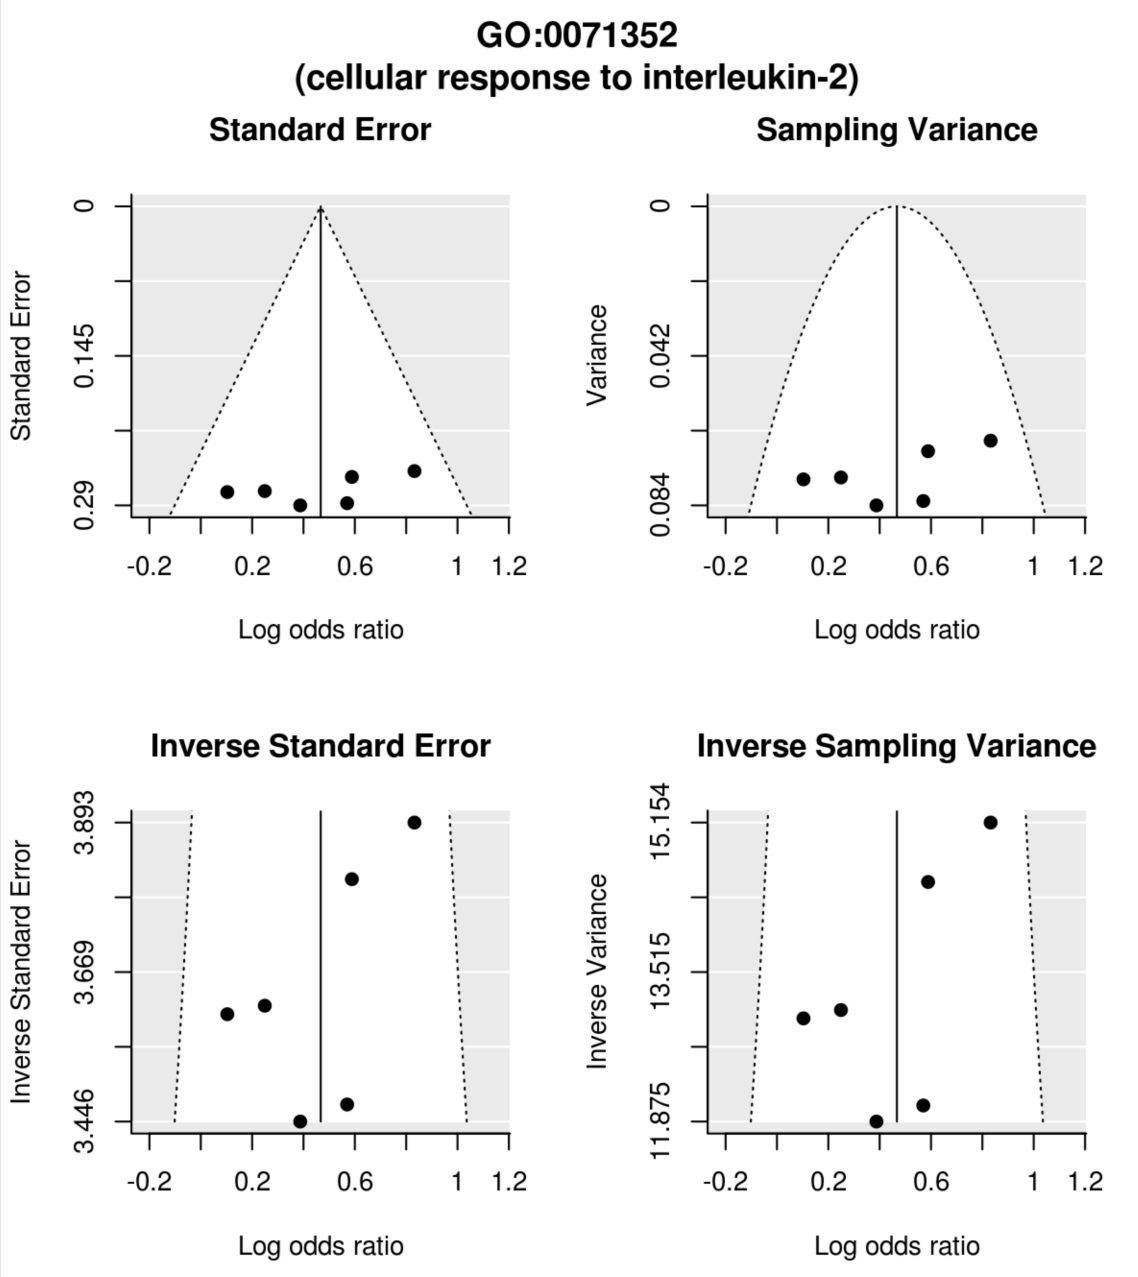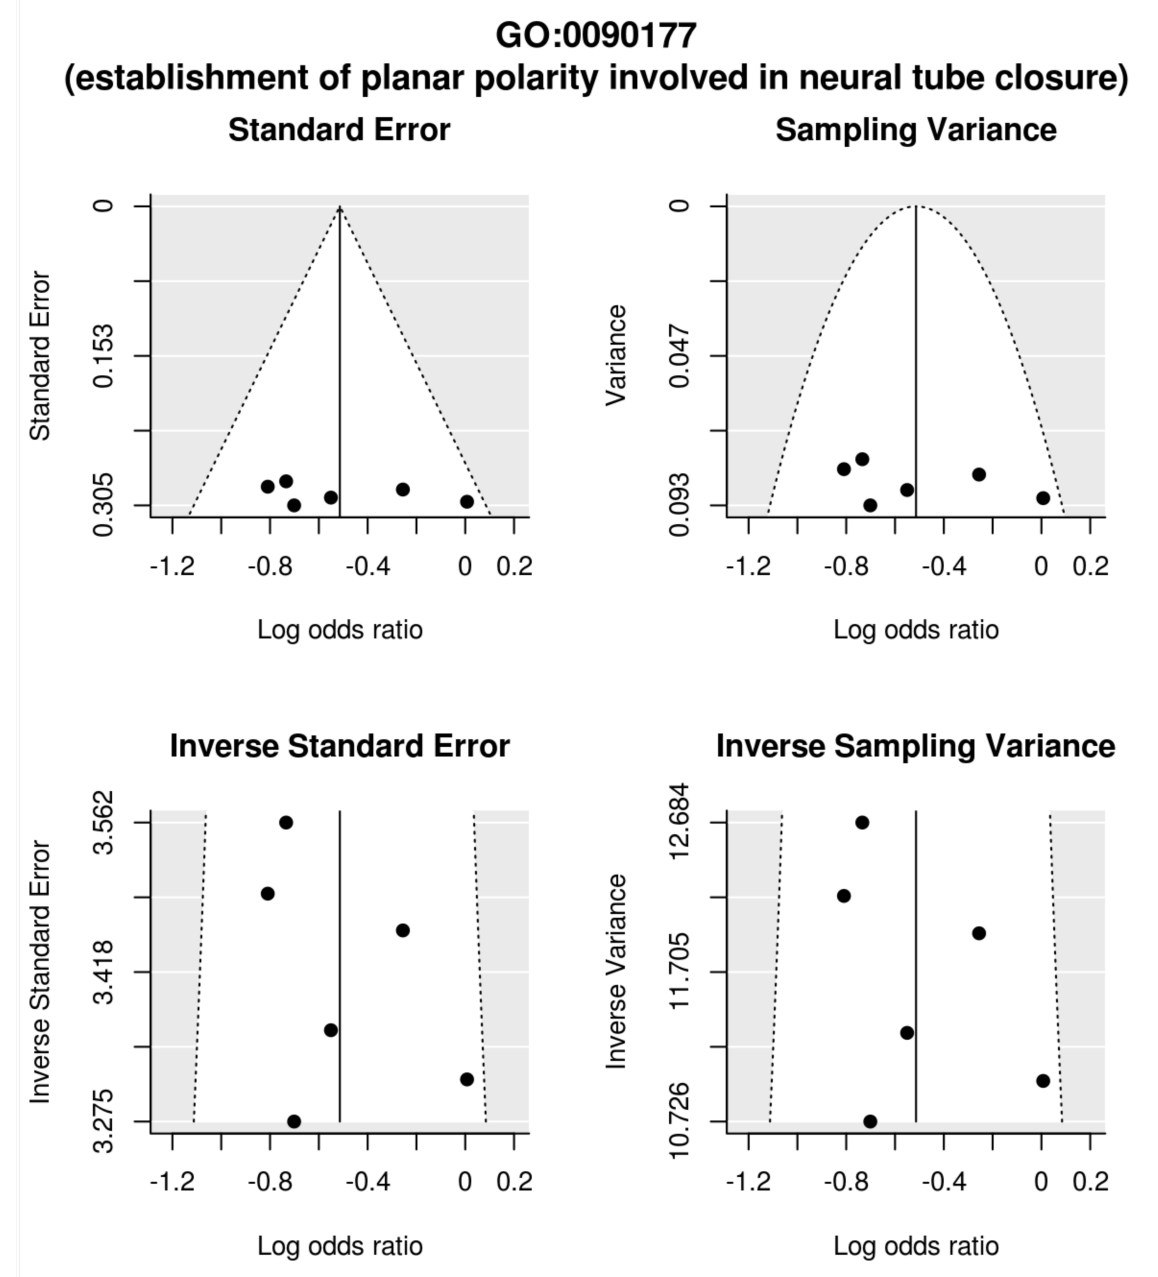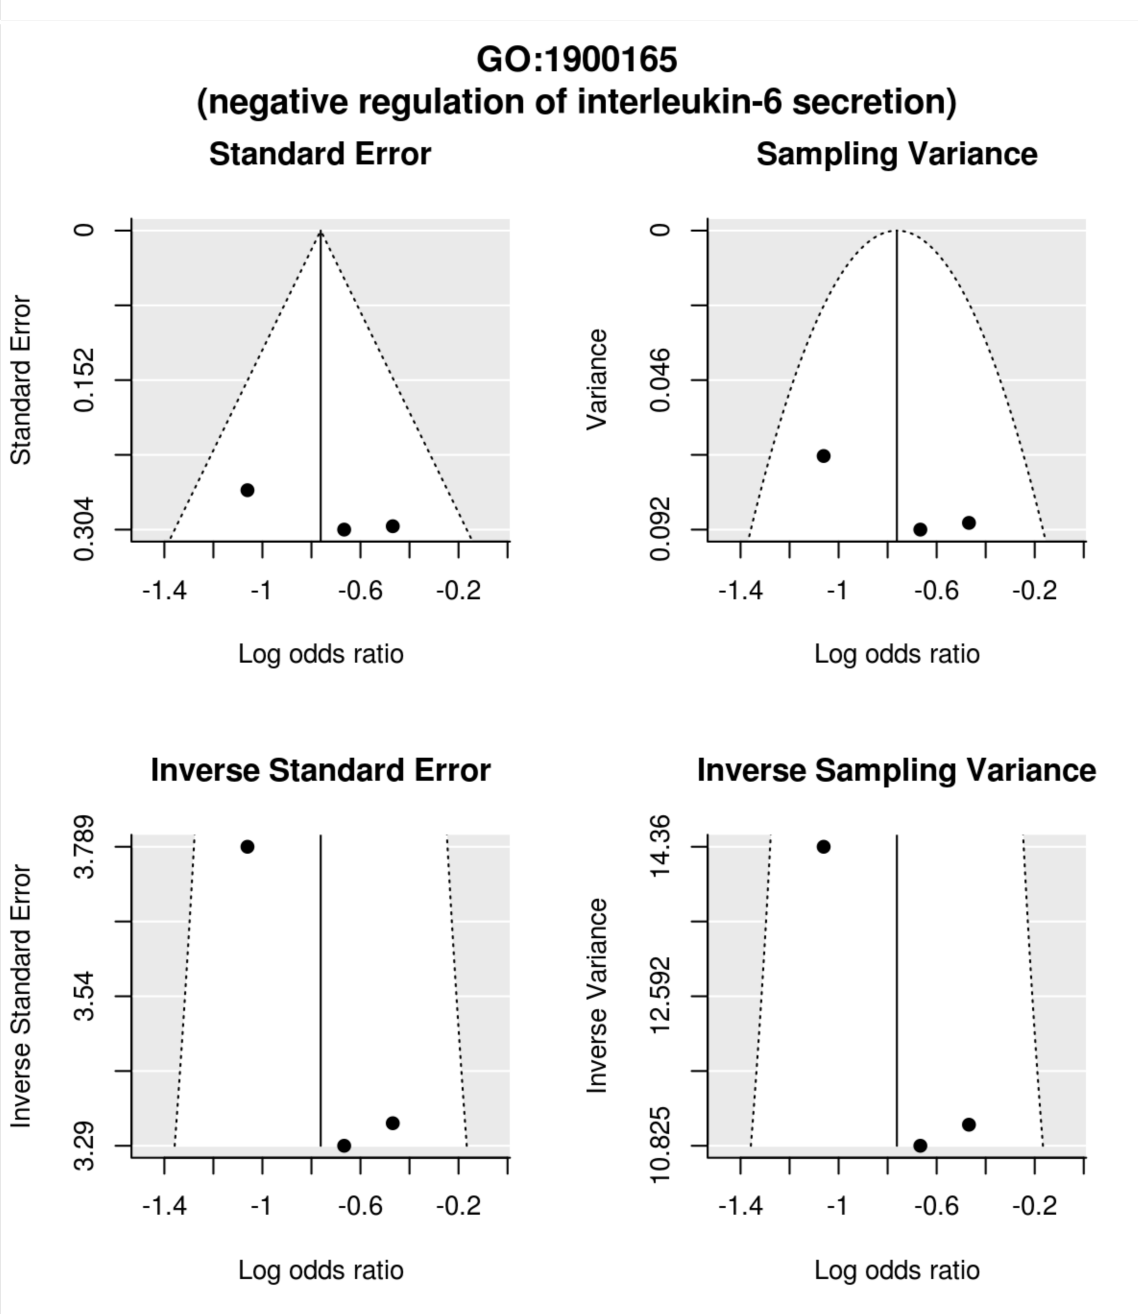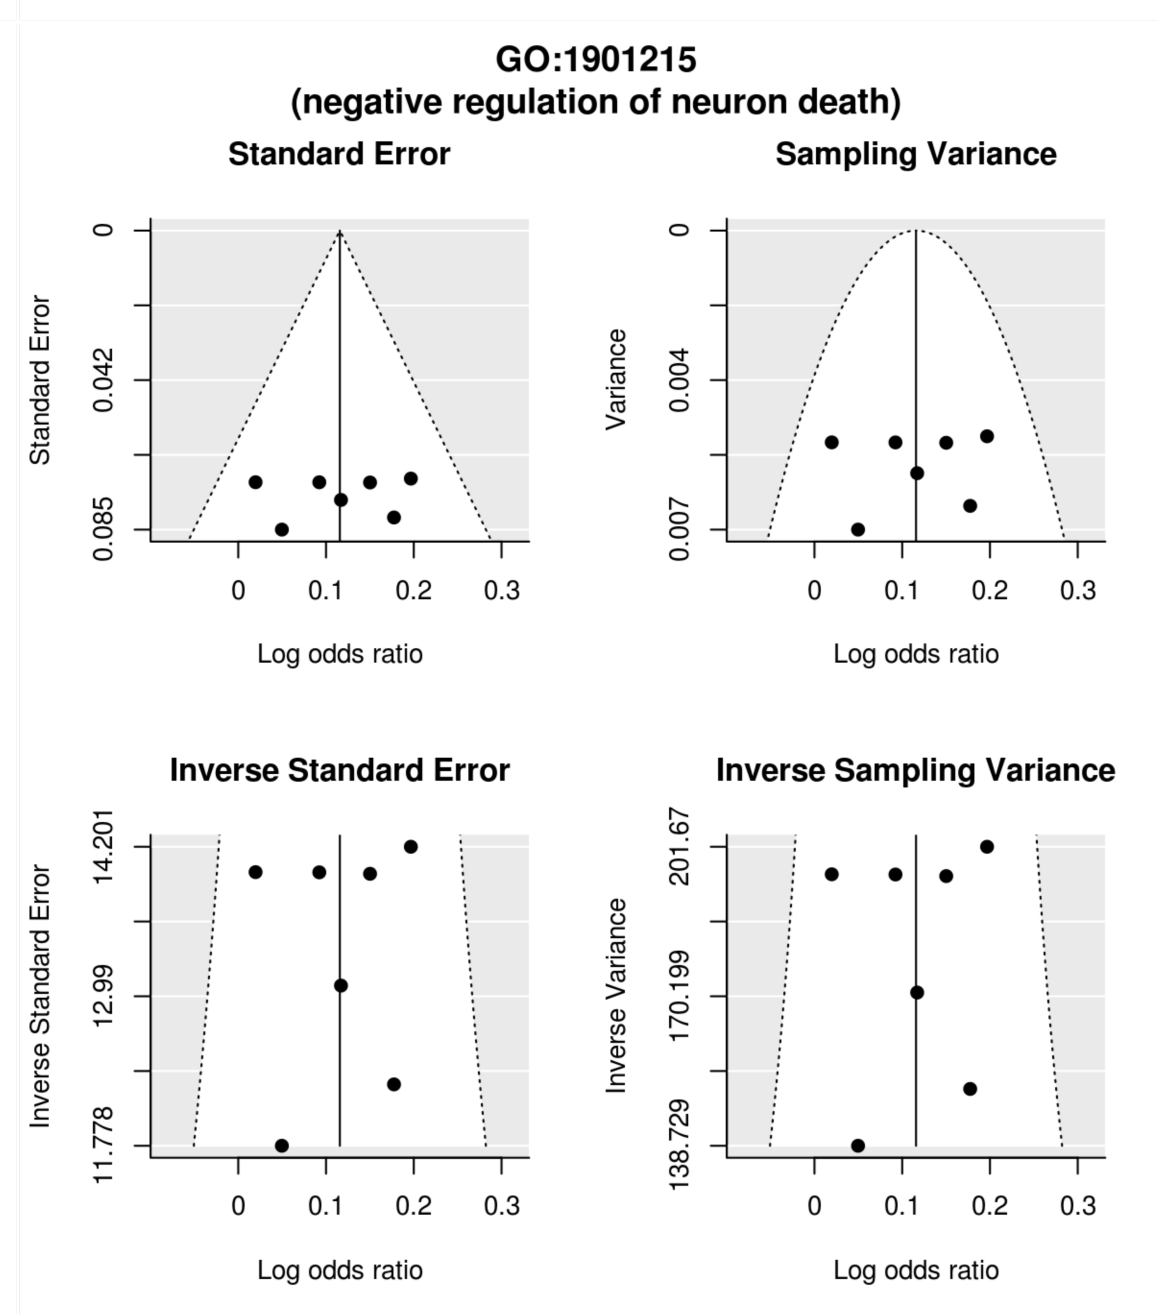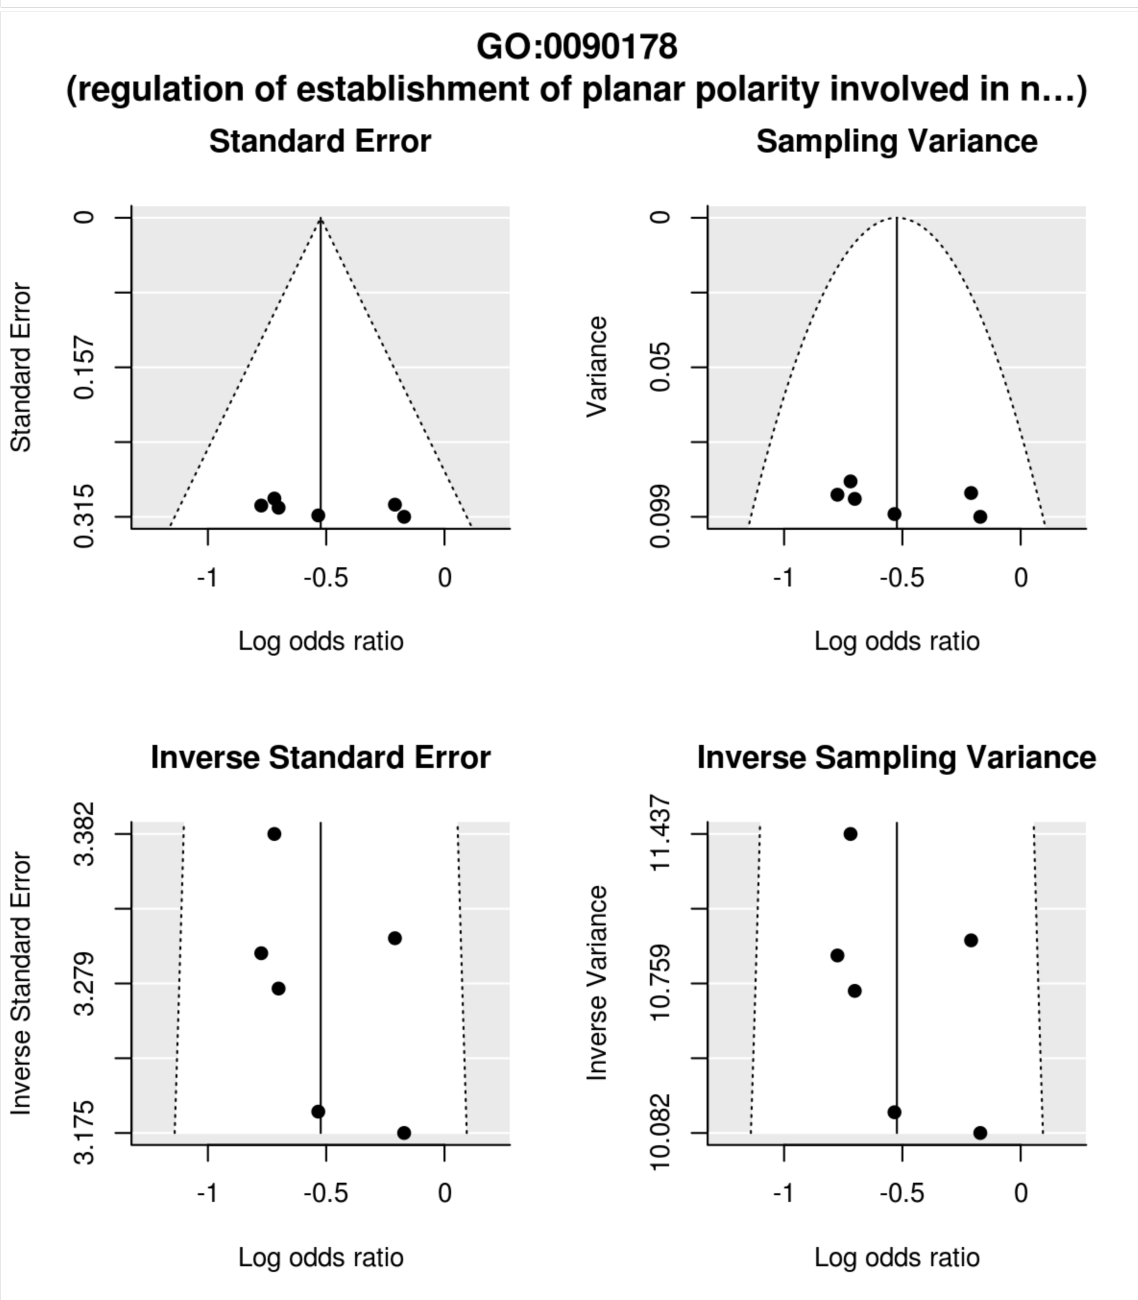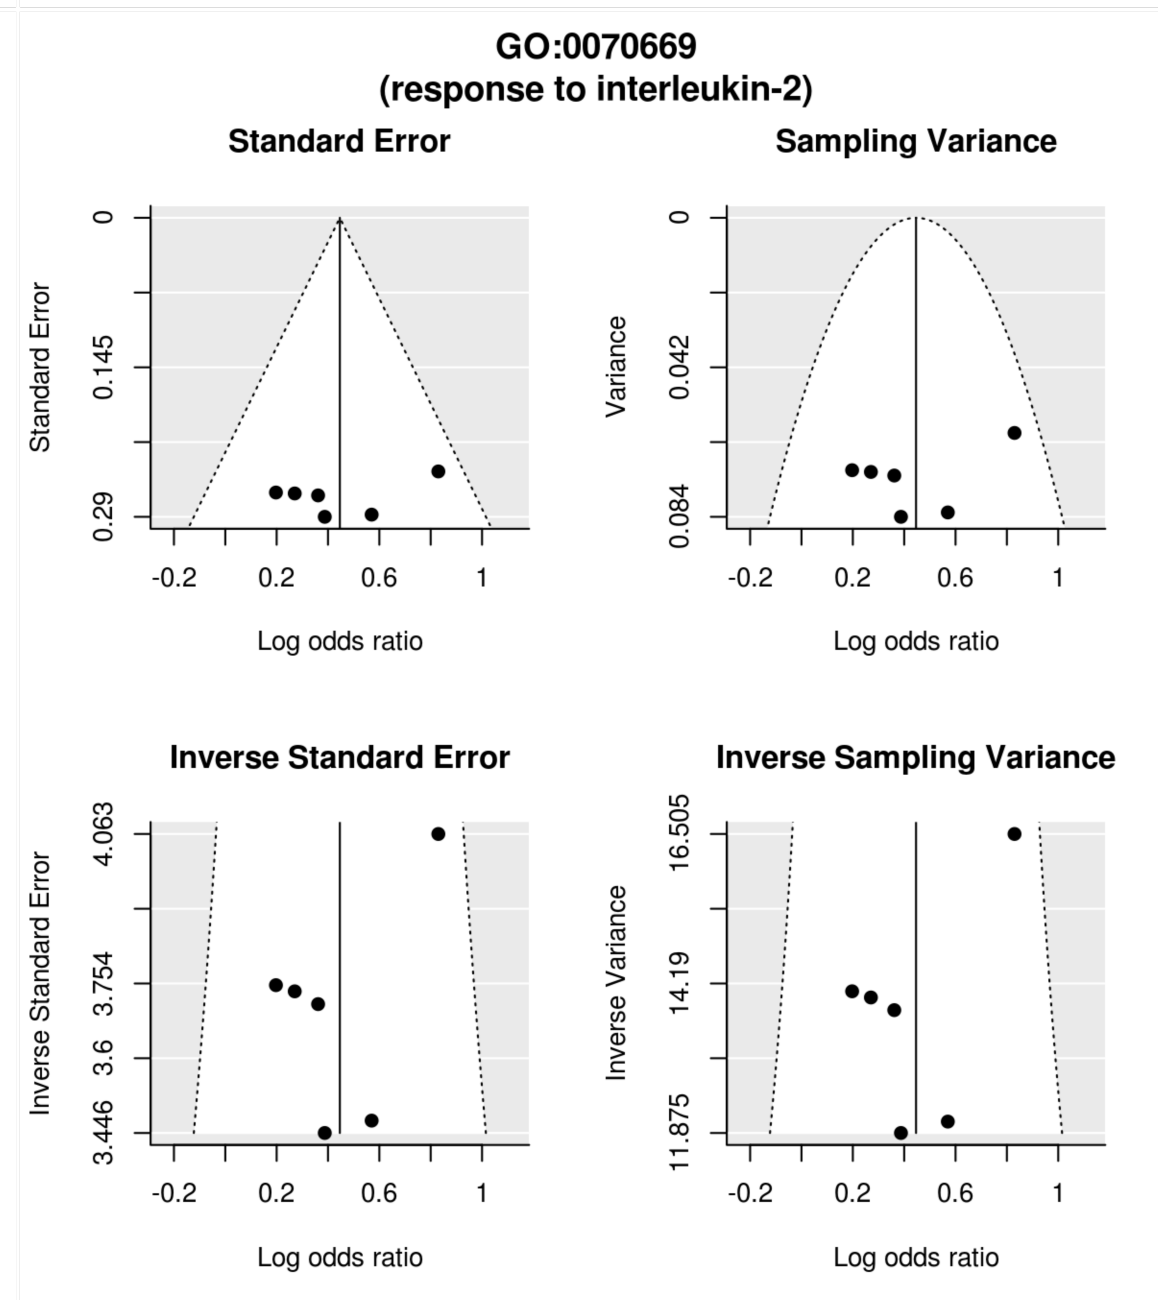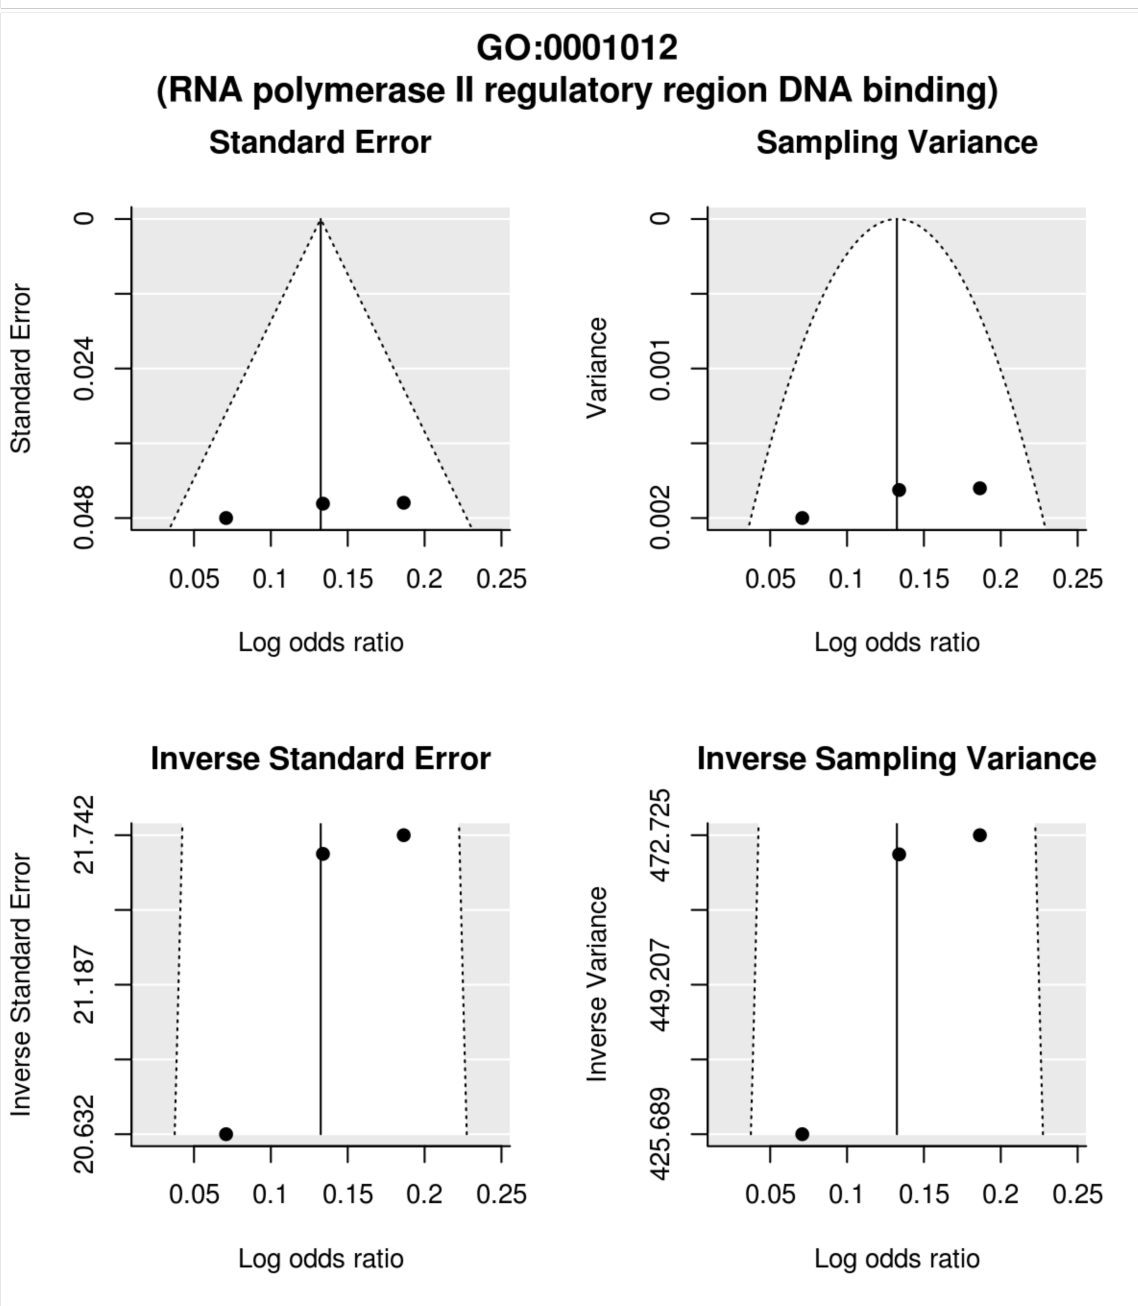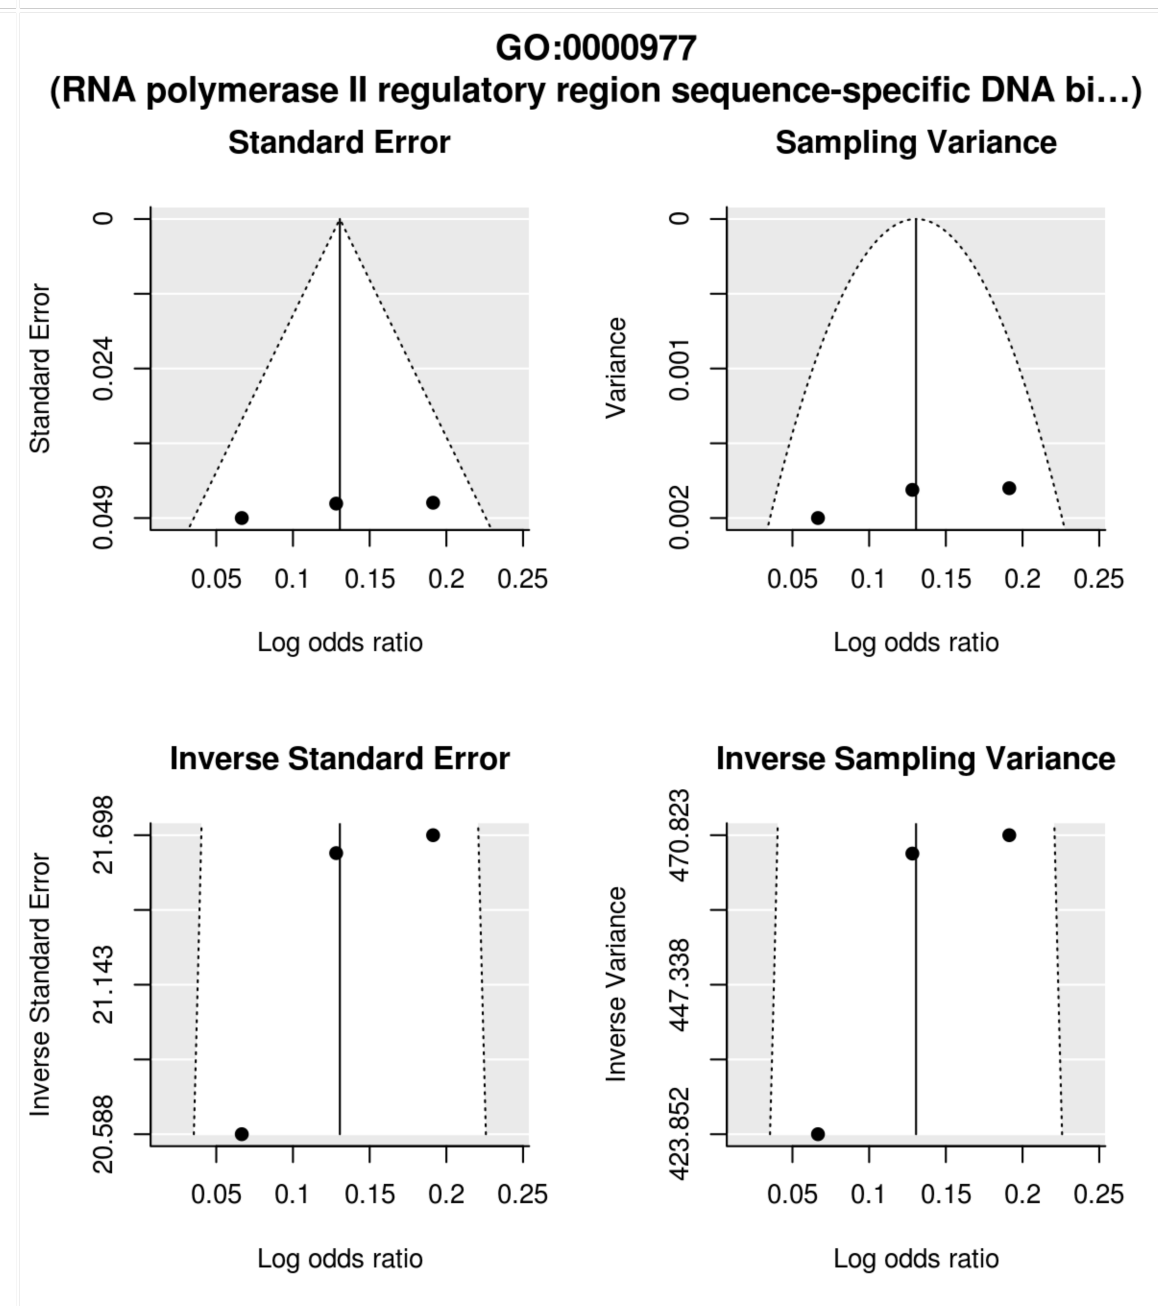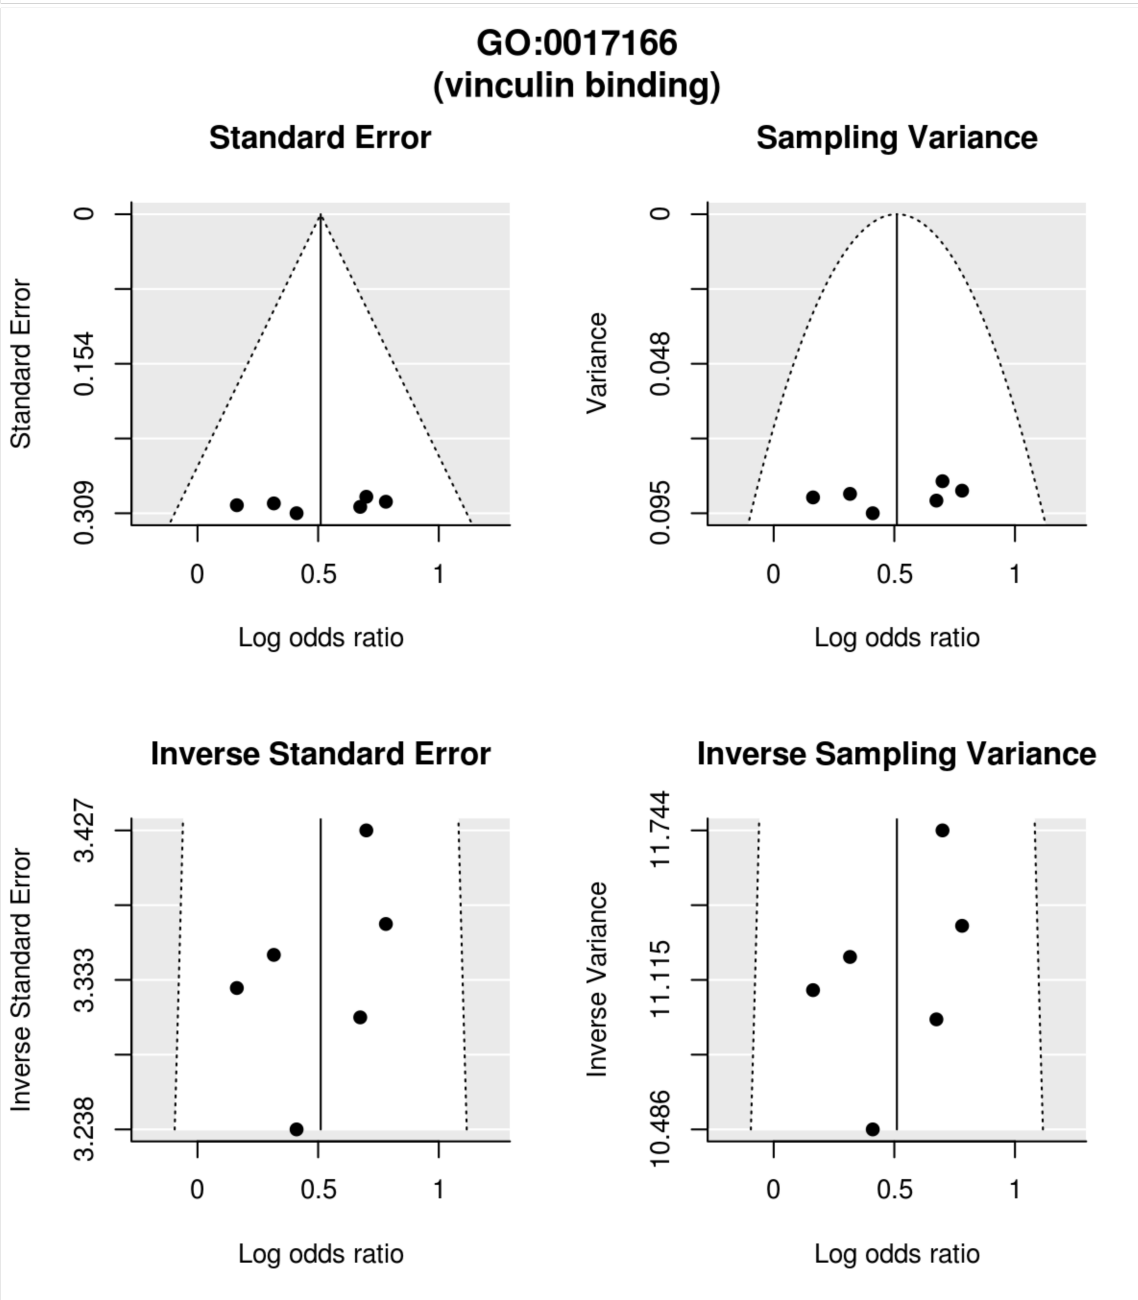

**Supplementary Figure 4. Funnel plots of the significant GO terms from our functional gene meta-analysis.** In the absence of bias and heterogeneity, we would expect the points to be distributed in the form of a funnel, within the region of confidence.
